# Supplementary material for: Enhancing physical activity in older type 2 diabetic adults through remote patient monitoring: a pre-post study in Taiwan
Source: PeerJ. 2025 Jul 9;13:e19659. doi: 10.7717/peerj.19659 (PMC12255238; doi:10.7717/peerj.19659)
Supplement: Supplemental Information 1 [file peerj-13-19659-s001.xlsx]

## Sheet: data
age	sex	bmi	edu	glu	hba	alt	cr1	egf	cho	ldl	tg	ua	hg	mic	cr2	w1	w4	y	y1	adl0	iadl0	gr0	lg0	ws0	lw0	mm0	co0	gd0	ds0	mn0	mg0	cf0	fr0	frp0
65	2	19.829	4	90	5.3	9	0.84	72.32		90	82		13.7			959.5	1375	415.5	0	100	8	21	0	0.487805	1	30	0	0	0	11	1	3	0	0
66	1	18.9551	4	85	5.7	35	5.34	11.5	91	36	43	6813.6	7.5	352.4	51.72	210	315	105	0	100	1	13.3	1	0.334635	1	20	1	1	0	6	2	5	4	2
72	2	26.0672	5	99	6.3	23	0.86	68.94	169	124	75		13.4			402	536	134	0	100	7	19	0	0.305188	1	30	0	4	1	12	0	5	4	2
86	2	25.0913	0	109	6.9	27	0.76	76.69	165	92	206		11.7			452	523	71	0	95	7	11.7	1			15	0	2	1	13	0	5	4	2
76	2	24.2	2	115	10.9	7	0.79	75.41	140	77	104	7.3	12.7	0.7	96.55	959.5	1331	371.5	0	90	2	13	1	0.731707	1	20	1	1	0	13	0	3	1	1
78	2	23.74	3	97	5.9	15	0.78	75.92	157	100	135		14.4		99.64	950.167	1368.17	418	0	100	8	20.5	0	0.784314	1	29	0	1	0	14	0	3	0	0
82	2	23.3507	0	107		4	1.11	50.02		59			8.7			312	402	90	0	80	4	14.3	1			19	0	1	0	12	0	5	4	2
71	2	22.0719	3	119	5.6	30	0.69	89.14					11			1560.8	2666.75	1105.95	0	100	7	24.8	0	0.323974	1	30	0	0	0	9	1	2	0	0
72	1	21.7004	5	143	7.2	16	1.35	55.37	143	67	73	4.2		0.3	71.06	2699	4546.2	1847.2	0	100	7	28.3	0	0.535236	1	30	0	0	0	14	0	3	0	0
74	1	26.2	4	97	5.4	21	2.13	32.53	153	70	49		10.6		146.43	5440	7792.5	2352.5	0	100	8	23.5	1	0.784314	1	29	0	1	0	14	0	3	0	0
71	2	23.833	1	129	6.9	17	1.28	43.69	159	90	161	100.3		5.5	54.86	591.4	772.4	181	0	100	8	21	0	0.91047	1	29	0	1	0	14	0	3	0	0
74	1	24.3734	2		5.2	18	1.05	73.38	175	94	219		13.6			959.5	1412.75	453.25	0	100	4	32.7	0	0.629591	1	20	1	0	0	14	0	3	0	0
72	2	25.64	2	90	7.8	19	1.35	40.97	141	79	139	93.9		3.6	38.33	3869.4	4664.33	794.933	0	100	8	18.6	0	0.545455	1	28	0	0	0	14	0	4	0	0
84	1	27.6817	0	96	5.6	20	1.06	72.79	112	48	101		15		55.39	3911.67	4212	300.333	0	100	8	29	0	0.91047	1	29	0	1	0	14	0	3	0	0
68	2	18.6	3	83	5.6	34	1.2	47.48	150	73	106	44.9	10.6	2	44.5	1443.6	2678	1234.4	0	100	8	14	1	0.714286	1	0	1	1	0	4	2	3	0	0
73	1	24.9	2	165		14	0.92	85.71					12.3			1971.17	2743.6	772.433	0	100	7	31	0	0.9375	1	25	0	0	0	11	1	3	0	0
74	1	17.0058	2													315	501	186	0	75	0	12.2	1					5	1	5	2	5	4	2
76	1	27.415	2	153	7.4	11	1.03	74.63	139	88	80	16.6	12.8	1.4	84.19	1894.6	2815	920.4	0	100	6	33	0	0.399202	1	22	1	1	0	14	0	3	0	0
86	1	28.6288	5	93	5.8	21	1.38	51.93	160	86	133		13.4			957.8	1216.5	258.7	0	100	6	35.1	0	0.380228	1	29	0	0	0	14	0	3	0	0
67	1	24.4175	4	92	5.8	24	1.52	48.86	220	137	94	2.5	15.5	0.4	160.33	1233	2709.25	1476.25	0	100	6	38	0	0.529101	1	28	0	2	1	14	0	2	0	0
74	2	25.6745	3	183	7.1	10	0.8	74.52	199	121	162	4.9		0.3	61.28	1430.5	2394.2	963.7	0	100	8	14.2	1	0.613497	1	25	0	1	0	14	0	2	0	0
85	2	29.6643	2	90	5.6	16	1.88	27.03	140	65	171		12.8		173.85	1233	2581.57	1348.57	0	80	0	18.9	0			19	1	1	0	11	1	3	0	0
67	2	30.48	3	152	6.6	21	0.54	120.05	164	110	79	11.2	12.3	0.6	53.49	6419.2	7916	1496.8	0	100	8	20.5	0	0.784314	1	29	0	1	0	14	0	3	0	0
73	2	27	3	140	7.8	17	0.77	78.1	179	81	130	16.4		2.6	158.89	2237.6	2694.6	457	0	100	7	18	0	0.923077	1	27	0	0	0	11	1	3	0	0
78	2	24.5203	3	112	6.1	14	1.02	55.71	206	131	87	7.2	11.5	1	139.08	4746.5	6438.5	1692	0	100	8	15.6	1	0.543971	1	29	0	1	0	14	0	3	0	0
80	2	22.5229	4	110	5.6	20	1	56.7	170	92	86		13.1			1430.5	2639	1208.5	0	100	8	17.2	1	0.604839	1	29	0	0	0	14	0	3	0	0
62	2	18.53	2	102	5.9	17	0.66	96.45	207	105	53	11.5	12.8	1.7	147.39	2091	2744	653	0	100	8	24	0	1.05263	0	26	0	1	0	14	0	3	0	0
72	1	29	2	106	8.6	14	7.93	7.16	139	80	142	1130.6	12.2	126.8	112.15	1560.8	3101.75	1540.95	0	55	4	10.5	1			15	1	1	0	9	1	5	2	1
67	2		2	120	6.9	23	1	58.78	174	89	63	173	12.5	12.3	71.1	6173.8	8201	2027.2	0	100	8	23	0	0.833333	1	26	0	0	0	14	0	2	0	0
72	1	31.8878	0	100					190		115					6173.8	4235.33	-1938.47	1	100	8	23	1	0.555556	1	29	0	1	0	14	0	3	0	0
66	2	18.6	3	72	5.5	10	0.59	108.73	170	99	123	75.8	12.9	5.6	73.86	5165	2706.25	-2458.75	1	100	8	14	1	1.03448	0	0	1	1	0	4	2	3	0	0
69	1	27.5176	5	108	5.7	11	0.87	92.75	150	84	68		12.3			10044.8	8742.4	-1302.43	1	100	6	31.8	0	0.618557	1	30	0	0	0	14	0	3	0	0
91	1	24.677	2	132	7	12	1.39	50.8	137	74	65	20.5		1.6	78.09	412	425	13	0	100	3	23.4	1			25	0	0	0	14	0	3	0	0
70	2	21.6	2	132	6.9	9	0.63	99.29	107	47	86	7.8		0.3	38.56	3285.6	2879.6	-406	1	100	8	15	1	0.882353	1	26	0	0	0	11	1	2	0	0
75	2	33.29	0	112	6.1	14	0.7	86.94	192	75	182	10.4	12.5	1	96.51	2237.6	2230.5	-7.1	1	80	8	15	1	0.588235	1	29	0	1	0	14	0	3	0	0
80	2	22.4303	3	108	5.8	22	0.99	57.36	224	127	119		14.9			1125	125	-1000	1	80	3	10.7	1			27	0	4	1	9	1	3	1	1
65	2	22.86	3	98	5.9	25	0.76	81.43	195	123	124		14.5			6227.8	7271.25	1043.45	0	100	8	19	0	0.784314	1	29	0	1	0	14	0	3	0	0
58	1	24.74	2													3492.6	4115	622.4	0	95	7	17.5	1			14	1	4	1	14	0	5	4	2
79	1	24.1603	4	90	5.3	11	2.59	25.55	137		93	109.2	12.6	14.9	136.43	1203	1256	53	0	90	2	13.1	1	0.329128	1	27	0	1	0	14	0	3	0	0
71	2	22.4	5	84												2348.33	2735.8	387.467	0	100	8	16	1	0.705882	1	30	0	0	0	13	0	3	0	0
95	1	23.9588	5	108	6.1	18	1.22	58.66	152		56		13.9			564	856	292	0	70	0	26.4	1			23	1	0	0	13	0	3	1	1
72	1	26.1752	0	109	6	32	1.04	74.61	97	41	164	7.2	14.2	1.1	153.81	1233	4230.67	2997.67	0	100	8	22	1	1.2	0	28	0	1	0	14	0	3	0	0
76	2	31.7428	0	188	8.1	20	0.59	105.33	162	77	154	35.4	11.3	1.4	39.5	1971.17	2989.33	1018.17	0	90	6	13.8	1	0.348432	1	25	0	0	0	14	0	2	0	0
71	2	26.1	4	133	7	23	0.82	73.25	128	62	66	9.2	13.1	1.6	174.85	684.8	1277	592.2	0	95	8	18	0	1.03448	0	28	0	1	0	8	1	3	1	1
68	2	28.7	2	107	7.2	11	0.84	71.66					11.3			950.167	1354.4	404.233	0	90	3	15.1	1			20	1	3	1	13	0	4	2	1
78	2	23.2	2	98	6.4	18	0.75	79.64	139	62	83	10.2		0.6	59.03	946.8	1423.6	476.8	0	100	8	22.3	0	0.759494	1	22	1	1	0	14	0	2	0	0
74	2	26.8977	2	89	5.2	37										7156.5	8514.8	1358.3	0	100	6	19.3	0	0.271493	1	28	0	0	0	14	0	3	0	0
58	1	21.7	3	160	7.3	16	3.39	20.01	87	86	83	367.8	16	24.4	66.34	3285.6	2874.75	-410.85	1	100	8	20.5	1	0.784314	1	29	0	1	0	14	0	3	0	0
74	2		2	140	6.5	12	0.67	91.45	209	131	84	7.6	13.3	1.3	170.96	3273	3959.5	686.5	0	100	8	18.4	0	0.869565	1	26	0	0	0	14	0	2	0	0
87	1	24.8163	1	84	5.2	19	1.27	58.6	98	40	89		14.1			1407	1359.43	-47.5714	1	100	8	22	1	0.821918	1	29	0	1	0	14	0	3	0	0
68	2	34.5004	4	207	7.4	60	1.45	38.17	133	68	176	2050	8.6	37.7	18.39	1201	1245	44	0	85	2	12.3	1			30	0	2	1	11	1	3	1	1
71	1	33.8	5	122	6.4	33	1.36	54.9	186	131	64	15.3	13.9	2.1	137.57	2280	3024.5	744.5	0	100	7	30	0	0.731707	1	26	0	1	0	11	1	3	0	0
64	1	26	4	135	7.3	32	1.07	73.95	135	99	108	6.7	12.7	1.2	178.93	3273	4488.2	1215.2	0	100	8	33	0	0.833333	1	30	0	1	0	8	1	2	0	0
76	2	27.1251	0	95	5.9	11	0.82	72.04					12.1			812	894	82	0	80	3	16.7	1			16	0	3	1	8	1	5	4	2
93	2	26.8006	2	141	5.7	17	1.11	48.75	200	115	228		11.4			845	923	78	0	70	3	14.3	1			17	1	0	0	13	0	5	4	2
62	2	25	5													1443.6	1403.5	-40.1	1	100	8	21	0	0.405405	1	27	0	0	0	14	0	2	0	0
79	2	21.9284	2	123	6.4	19	0.83	70.67	158	90	77	13.7	12.4	1.3	95.23	4746.5	4673.4	-73.1	1	90	8	15.8	1	0.405954	1	30	0	0	0	14	0	3	0	0
86	1	25.053	2	130	5.6	32	1.85	37.02	172	120	142	7.9	12.2	0.6	76.37	512	621	109	0	90	7	28.8	0			17	1	1	0	14	0	3	0	0
67	2	19.9474	5	143	7.6	23	1.02	57.45	119	44	76	72.2	10.1	3.3	45.71	1236	1345	109	0	100	7	19.5	0			30	0	3	1	10	1	3	0	0
77	2	24.7245	2	109	6.1	15	1.28	42.98					9.8			542	841	299	0	70	2	13.6	1			25	0	1	0	12	0	5	4	2
66	2	28.1373	0													7156.5	7898.4	741.9	0	100	8	25.4	0	0.469116	1	19	0	0	0	14	0	3	0	0
70	2	21.25	4	173	8.1	32	0.72	85.11	112	55	75	19.9		1.6	80.52	11422.4	9683.75	-1738.65	1	100	8	22	0	0.659341	1	29	0	1	0	14	0	3	0	0
67	2	19.1	3	202	8.6	36	0.72	86.14	155	87	172	16	15.7	1.4	87.25	3349	2726	-623	1	100	8	30	0	0.784314	1	29	0	1	0	14	0	3	0	0
73	2	33.4221	0	121	6.1	39	1.04	55.21	164	103	115	3.5	12.7	0.1	28.88	2348.33	2180.6	-167.733	1	80	3	21.2	0	0.420463	1	20	0	1	0	14	0	3	0	0
72	2	25.6	1	119	5.7	23	0.81	74.08	189	109	96	7.6	15.9	0.5	66.09	2261	2581.17	320.167	0	95	8	19	0	0.659341	1	28	0	1	0	11	1	3	0	0
71	1	34.6	3	153	10.3	16	8.25	6.88	117	65	102	6629.4	10.3	817.8	123.36	2329.8	1323.25	-1006.55	1	100	8	29	0	0.91047	1	29	0	1	0	14	0	3	0	0

## Sheet: coding
		Age	age
		Gender, n (%)	sex	1'Male' 2'Female'.
		Body mass index, kg/m2	bmi
		Educational level, n (%)	edu	0'Illiterate' 1'Literate' 2'Primary school' 3'Junior high school' 4'Senior high school' 5'University'.
Laboratory data		Fasting plasma glucose (mg/dL)	glu
		Hemoglobin A1c (%)	hba
		Alanine transaminase (U/L)	alt
		Creatinine (mg/dL)_Blood	cr1
		Estimated glomerular filtration rate (mL/min/1.73m2)	egf
		Cholesterol (mg/dL)	cho
		Low-density lipoproteins (mg/dL)	ldl
		Triglyceride (mg/dL)	tg
		Urine albumin-creatinine ratio (UACR)	ua
		Hemoglobin (g/dL)	hg
		Microalbumin	mic
		Creatinine(mg/dL)_Urine	cr2
	week1	Tracking daily step counts in the first week	w1
	week8	Tracking daily step counts in the last week	w4
		The difference in step counts between the first and the last weeks	y
		Regress (Step counts between the first and the last weeks)	y1	0'No' 1'Yes'.
The comprehensive geriatric assessment in the first week	Functional capacity	First_Barthel index of activities of daily living, Median (IQR)	adl0
	Functional capacity	First_Lawton instrumental activities of daily living, Median (IQR)	iadl0
	Physical performance	First_Handgrip strength, Median (IQR)	gr0
	Physical performance	First_Low muscle strength, n (%)	lg0	0'No' 1'Yes'.	Male<28kgw/Female<18kgw
	Physical performance	First_6-meter walking speed, Median (IQR)	ws0
	Physical performance	First_Low physical performance, n (%)	lw0	0'No' 1'Yes'.	步速：<1m/s為異常
		First_Mini-mental state examination, Median (IQR)	mm0
		First_Cognitive impairment, n (%)	co0	0'No' 1'Yes'.	MMSE, Illiterate+Literate≤13/Primary school+Junior high school+Senior high school+University≤24為異常
		First_Five-item geriatric depression scale, Median (IQR)	gd0
		First_Depressive symptoms, n (%)	ds0	0'No' 1'Yes'.	GDS≥2為異常
		First_Mini-nutritional assessment-short form, Median (IQR)	mn0
		First_Mini-nutritional assessment-short form, n (%)	mg0	0'Normal' 1'At risk' 2'Malnutrition'.	Normal ≥12 / At risk 8-11/ Malnutrition ≤7
		First_Clinical Frailty Scale, n (%)	cf0	1'Very fit' 2'Well' 3'Managing well' 4'Vulnerable' 5'Mildly frail' 6'Moderately frail' 7'Severely frail' 8'Very severely frail' 9'Terminally ill'.
		First_FRAIL	fr0
		First_Fried frailty phenotype, n (%)	frp0	0'Robust' 1'Pre-frailty' 2'Frailty'.	FRAIL分數_Robust 0 Pre-frailty 1或2 Frailty 3以上
